# Supplementary material for: Loss of Host Type-I IFN Signaling Accelerates Metastasis and Impairs NK-cell Antitumor Function in Multiple Models of Breast Cancer
Source: Oxford University Press journal article supplement (doi:10.1158/2326-6066.cir-15-0065), 2015-07-21
Supplement: 23266066cir150065-sup-146481_1_supp_0_nqvfbt.docx [file 23266066cir150065-sup-146481_1_supp_0_nqvfbt.docx]

**SUPPLEMENTARY FIGURE LEGENDS**

**Supplementary Figure 1.**

**Loss of hematopoietic Ifnar1 reduces metastasis-free survival in the 4T1.2 model.**

WT hosts reconstituted with either WT (*n*=20) or Ifnar1-/- (*n*=13) bone marrow and orthotopically injected with 1x105 4T1.2 cells 6 weeks after successful engraftment. **(A)** Primary tumor growth and **(B)** disease-free survival post primary tumor resection were quantified. ****p* < 0.0005 compared with WT chimeras using the Mantel-cox log-rank test. Error bars represent SEM.

**Supplementary Figure 2.**

**IL-2 stimulated NK cells derived from Ifnar1-/- or WT mice have comparable cytotoxicity against syngeneic breast tumor lines**

NK cells from WT and Ifnar1-/- mice were purified and activated with IL-2 (1000 U/mL) for 5 days before performing standard 4 hr cytotoxicity assays as described in the materials and methods (pooled NK cells from 3 mice were used in experiments with 3 technical replicates, repeated twice). Error bars indicate SEM of all replicates.

**Supplementary Figure 3.**

**Immune suppressor cell and T lymphocyte accumulation in the peripheral blood of WT and Ifnar1-/- mice.**

Femaleage matched WT (*n*=4) and Ifnar1-/- (*n*=4) mice were orthotopically injected with 1x105 66cl4 cells and blood samples were analysed on the days indicated for circulating CD4+ and CD8+ T cells by flow cytometery. Data are represented as the percentage of peripheral blood lymphocytes (PBL). **p* < 0.05, ****p* < 0.0005. Error bars represent SEM.

**Supplementary Figure 4.**

**Anti-proliferative effects and production of type-I IFN by balb/c syngeneic breast tumor cell lines**

**(A)** Proliferation of 4T1 and 66cl4 cells was measured over time in the presence of 1000 I.U. / mL mIFNα or β. Data represent three independent experiments, each of which represent the average of three technical replicates. Error bars represent SEM. **(B)** Secretion of IFNα by 4T1 and 66cl4 cells 18 hours after transfection with poly(I:C) (10 μg / mL). Data shown are from one ELISA and representative of three independent experiments. Error bars represent the 95% confidence interval. **(C)** Representative western blot images of Irf7 protein level among the Miller series of cell lines.
